# Supplementary material for: Prevalence of multimorbidity in community settings: A systematic review and meta-analysis of observational studies
Source: PubMed Central journal article supplement — J Comorb. 2019 Aug 22;9:2235042X19870934. doi: 10.1177/2235042X19870934 (PMC6710708; doi:10.1177/2235042x19870934), 2019-08-22

## Supplement 1: PRISMA checklist

| Section and topic                 | Item No | Checklist item                                                                                                                                                                                                                                                                                                                                                                                                                                                                                                                                                                                                                                                                                                                                                                                                        |
|-----------------------------------|---------|-----------------------------------------------------------------------------------------------------------------------------------------------------------------------------------------------------------------------------------------------------------------------------------------------------------------------------------------------------------------------------------------------------------------------------------------------------------------------------------------------------------------------------------------------------------------------------------------------------------------------------------------------------------------------------------------------------------------------------------------------------------------------------------------------------------------------|
| <b>ADMINISTRATIVE INFORMATION</b> |         |                                                                                                                                                                                                                                                                                                                                                                                                                                                                                                                                                                                                                                                                                                                                                                                                                       |
| Title                             |         |                                                                                                                                                                                                                                                                                                                                                                                                                                                                                                                                                                                                                                                                                                                                                                                                                       |
| Identification                    | 1a      | <b>Identify the report as a protocol of a systematic review</b><br>Prevalence of multimorbidity in community settings: a systematic review and meta-analysis of observational studies.                                                                                                                                                                                                                                                                                                                                                                                                                                                                                                                                                                                                                                |
| Update                            | 1b      | <b>If the protocol is for an update of a previous systematic review, identify as such</b><br>N/A                                                                                                                                                                                                                                                                                                                                                                                                                                                                                                                                                                                                                                                                                                                      |
| Registration                      | 2       | <b>If registered, provide the name of the registry (such as PROSPERO) and registration number</b><br>PROSPERO – Ref no. CRD42018087435                                                                                                                                                                                                                                                                                                                                                                                                                                                                                                                                                                                                                                                                                |
| Authors                           |         |                                                                                                                                                                                                                                                                                                                                                                                                                                                                                                                                                                                                                                                                                                                                                                                                                       |
| Contact                           | 3a      | <b>Provide name, institutional affiliation, e-mail address of all protocol authors, provide physical mailing address of corresponding author</b><br><p>Hai Nguyen<br/>King's College London<br/><a href="mailto:hai.nguyen@kcl.ac.uk">hai.nguyen@kcl.ac.uk</a></p> <p>Gergana Monolova<br/>King's College London<br/><a href="mailto:gergana.monolova@kcl.ac.uk">gergana.monolova@kcl.ac.uk</a></p> <p>Christina Daskalopoulou<br/>King's College London<br/><a href="mailto:christina.daskalopoulou@kcl.ac.uk">christina.daskalopoulou@kcl.ac.uk</a></p> <p>Dr Matthew Prina<br/>King's College London<br/><a href="mailto:matthew.prina@kcl.ac.uk">matthew.prina@kcl.ac.uk</a></p> <p>Dr Silia Vitoratou<br/>King's College London<br/><a href="mailto:silia.vitoratou@kcl.ac.uk">silia.vitoratou@kcl.ac.uk</a></p> |

|                           |    |                                                                                                                                                                                                                                                                                                                                                                                                                                                                          |
|---------------------------|----|--------------------------------------------------------------------------------------------------------------------------------------------------------------------------------------------------------------------------------------------------------------------------------------------------------------------------------------------------------------------------------------------------------------------------------------------------------------------------|
|                           |    | <p>Prof. Martin Prince<br/>King's College London<br/><a href="mailto:martin.prince@kcl.ac.uk">martin.prince@kcl.ac.uk</a></p> <p>Corresponding author:<br/>Hai Nguyen<br/>Institute of Psychiatry, Psychology &amp; Neuroscience<br/>Health Service &amp; Population Research Dept, PO36<br/>Centre for Global Mental Health &amp; Primary Care Research<br/>David Goldberg Centre<br/>De Crespigny Park<br/>London<br/>SE5 8AF<br/>United Kingdom</p>                   |
| Contributions             | 3b | Describe contributions of protocol authors and identify the guarantor of the review                                                                                                                                                                                                                                                                                                                                                                                      |
| Amendments                | 4  | <p><b>If the protocol represents an amendment of a previously completed or published protocol, identify as such as list changes; otherwise, state plan for documenting important protocol amendments</b></p> <p>N/A</p>                                                                                                                                                                                                                                                  |
| Support                   |    |                                                                                                                                                                                                                                                                                                                                                                                                                                                                          |
| Sources                   | 5a | Indicate sources of financial or other support for the review                                                                                                                                                                                                                                                                                                                                                                                                            |
| Sponsor                   | 5b | Provide name for the review funder and/or sponsor                                                                                                                                                                                                                                                                                                                                                                                                                        |
| Role of sponsor or funder | 5c | Describe roles of funder(s), sponsor(s), and/or institution(s), if any, in developing the protocol                                                                                                                                                                                                                                                                                                                                                                       |
| <b>INTRODUCTION</b>       |    |                                                                                                                                                                                                                                                                                                                                                                                                                                                                          |
| Rationale                 | 6  | <p><b>Describe the rationale for the review in the context of what is already known</b></p> <p>As the world's populations are ageing rapidly, multimorbidity, the co-existence of two or more chronic diseases in an individual (Morrison et al, 2016), is becoming a major concern in public health. Patients experiencing multiple chronic conditions often have poorer health outcomes, such as declined physical and mental health functioning, higher mortality</p> |

|                      |   |                                                                                                                                                                                                                                                                                                                                                                                                                                                                                                                                                                                                                                                                                                                                                                                                                                                                                                                                                                                                                                                                                                                                                                                                                                                                                                                                                                                                                                                                                                                                                                                                                                                                                                                                                                                                                                                                                                                                                                                                                                                                                                               |
|----------------------|---|---------------------------------------------------------------------------------------------------------------------------------------------------------------------------------------------------------------------------------------------------------------------------------------------------------------------------------------------------------------------------------------------------------------------------------------------------------------------------------------------------------------------------------------------------------------------------------------------------------------------------------------------------------------------------------------------------------------------------------------------------------------------------------------------------------------------------------------------------------------------------------------------------------------------------------------------------------------------------------------------------------------------------------------------------------------------------------------------------------------------------------------------------------------------------------------------------------------------------------------------------------------------------------------------------------------------------------------------------------------------------------------------------------------------------------------------------------------------------------------------------------------------------------------------------------------------------------------------------------------------------------------------------------------------------------------------------------------------------------------------------------------------------------------------------------------------------------------------------------------------------------------------------------------------------------------------------------------------------------------------------------------------------------------------------------------------------------------------------------------|
|                      |   | <p>rates and frailty (Fortin et al, 2007). Their needs for medical care are also different. Instead of a highly specialized but isolated approach, as used for single disease treatment, multimorbidity patients need a complex and structured care plan (Salisbury et al, 2011). This has serious impact on disease management, healthcare utilisation and costs (Huntley et al, 2012). To assess the impact of multimorbidity on public health and to project medical care needs for patients with multimorbidity, an accurate estimation of its prevalence is critical. Although multimorbidity prevalence and its variations have been examined and summarised in a number of systematic reviews, these reviews usually included studies in high-income countries (HICs). Only one review synthesised evidence on the prevalence and outcomes of multimorbidity in South Asia (Pati et al, 2015). Nonetheless, there has not been a review that systematically assessed the variations of multimorbidity prevalence estimates at a global level. The aim of this review is therefore to fill this gap in the literature.</p> <p>References:</p> <ol style="list-style-type: none"> <li>1. Fortin, M. et al. A systematic review of prevalence studies on multimorbidity: toward a more uniformed methodology. <i>Ann Fam Med</i>. 2012; 10(2): 142-151.</li> <li>2. Huntley, A. L. et al. Measures of Multimorbidity and Morbidity Burden for Use in Primary Care and Community Settings: A Systematic Review and Guide. <i>Annals of Family Medicine</i>, 2012; 10(2): 134-141.</li> <li>3. Morrison, D. et al. Managing multimorbidity in primary care in patients with chronic respiratory conditions. <i>NPJ Prim Care Respir Med</i>. 2016; 26: 16043</li> <li>4. Pati, S. et al. Prevalence and outcomes of multimorbidity in South Asia: A systematic review. <i>BMJ Open</i>. 2015; 10(5)</li> <li>5. Salisbury, C. et al. Epidemiology and impact of multimorbidity in primary care: a retrospective cohort study. <i>British Journal of General Practice</i>. 2011; 61(582): e12-e21</li> </ol> |
| Objectives           | 7 | <p><b>Provide an explicit statement of the question(s) the review will address with reference to participants, interventions, comparators, and outcomes (PICO)</b></p> <p>The objectives of this systematic review are:</p> <ol style="list-style-type: none"> <li>1. Summarise the available evidence in the literature on multimorbidity prevalence in HICs and LMICs, in the context of community settings.</li> <li>2. Carry out a meta-analysis of the prevalence estimates</li> <li>3. Assess how multimorbidity was operationalised across the different studies, to see whether this factor could partly explain the heterogeneity of the estimates</li> </ol>                                                                                                                                                                                                                                                                                                                                                                                                                                                                                                                                                                                                                                                                                                                                                                                                                                                                                                                                                                                                                                                                                                                                                                                                                                                                                                                                                                                                                                        |
| <b>METHODS</b>       |   |                                                                                                                                                                                                                                                                                                                                                                                                                                                                                                                                                                                                                                                                                                                                                                                                                                                                                                                                                                                                                                                                                                                                                                                                                                                                                                                                                                                                                                                                                                                                                                                                                                                                                                                                                                                                                                                                                                                                                                                                                                                                                                               |
| Eligibility criteria | 8 | <p><b>Specify the study characteristics (such as PICO, study design, setting, time frame) and report characteristics (such as years considered, language, publication status) to be used as criteria for eligibility for the review</b></p> <p><u>PICO</u></p>                                                                                                                                                                                                                                                                                                                                                                                                                                                                                                                                                                                                                                                                                                                                                                                                                                                                                                                                                                                                                                                                                                                                                                                                                                                                                                                                                                                                                                                                                                                                                                                                                                                                                                                                                                                                                                                |

|                     |     |                                                                                                                                                                                                                                                                                                                                                                                                                                                                                                                                                                                                                                                                                                                                                                                                                                                                                                                                                                                                                                                                                                                                                                                                                     |
|---------------------|-----|---------------------------------------------------------------------------------------------------------------------------------------------------------------------------------------------------------------------------------------------------------------------------------------------------------------------------------------------------------------------------------------------------------------------------------------------------------------------------------------------------------------------------------------------------------------------------------------------------------------------------------------------------------------------------------------------------------------------------------------------------------------------------------------------------------------------------------------------------------------------------------------------------------------------------------------------------------------------------------------------------------------------------------------------------------------------------------------------------------------------------------------------------------------------------------------------------------------------|
|                     |     | <ul style="list-style-type: none"> <li>Population: Eligible studies will include participants who are community based with no restrictions regarding age, sex, socioeconomic and demographic backgrounds. Studies that recruit participants from communal establishments, such as hospitals, hospices, nursing homes or prisons, will not be included.</li> <li>Intervention(s)/Exposure(s): N/A</li> <li>Comparator(s)/control(s): N/A</li> <li>Outcome: multimorbidity (prevalence)</li> </ul> <p><u>Study design</u><br/>Observational (cross-sectional and baseline of longitudinal) studies are eligible for inclusion in this review. Interventional studies (e.g. randomised controlled trial) will be excluded.</p> <p><u>Setting</u><br/>Community-based settings only.</p> <p><u>Report characteristics</u><br/>Studies included in this review are restricted to original, peer reviewed articles (published, either online or as hard copy, up to January 2018) in English language. Opinion pieces, conference presentations, books, letters, editorials, dissertations/theses or abstracts will not be included. Studies with an index disease (studies about comorbidity) will also be excluded.</p> |
| Information sources | 9   | <p><b>Describe all intended information sources (such as electronic databases, contact with study authors, trial registers or other grey literature sources) with planned dates of coverage</b></p> <p>MEDLINE (OVID interface)<br/>EMBASE (OVID interface)<br/>PsycINFO (OVID interface)<br/>Global Health (OVID interface)<br/>Web of Science<br/>COCHRANE Library</p> <p>The authors of the original articles will be contacted if supplementary data/information is required.</p>                                                                                                                                                                                                                                                                                                                                                                                                                                                                                                                                                                                                                                                                                                                               |
| Search strategy     | 10  | <p><b>Present draft of search strategy to be used for at least one electronic database, including planned limits, such that it could be repeated</b></p> <p>The term 'multimorbidity' and its various spellings (e.g. 'multi-morbidity', 'multimorbidities', 'multi-morbidities', 'multi morbidity', 'multi morbidities', 'multiple morbidities', 'multiple-morbidities') and ('prevalence' or 'epidemiology') will be used. We are interested in how 'multimorbidity' is defined so deliberately exclude 'comorbidity' and other synonyms. The search will be carried out on the electronic databases identified above. In addition, the references from relevant articles will be scanned through and appropriate papers from these lists will be included in the review.</p>                                                                                                                                                                                                                                                                                                                                                                                                                                     |
| Study records:      |     |                                                                                                                                                                                                                                                                                                                                                                                                                                                                                                                                                                                                                                                                                                                                                                                                                                                                                                                                                                                                                                                                                                                                                                                                                     |
| Data management     | 11a | <p><b>Describe the mechanism(s) that will be used to manage records and data throughout the review</b></p> <p>EndNote X8 will be used to store the retrieved articles from the electronic databases. This bibliographic management software maintains a searchable database of references related to the systematic review and creates citations when writing</p>                                                                                                                                                                                                                                                                                                                                                                                                                                                                                                                                                                                                                                                                                                                                                                                                                                                   |

|                         |     |                                                                                                                                                                                                                                                                                                                                                                                                                                                                                                                                                                                                                                                                                                                                                                                                                                                                                                                                                                                                                                                                                                                                                                                                                                                                                                                                                                                                                                                                                                                                                                                                                                     |
|-------------------------|-----|-------------------------------------------------------------------------------------------------------------------------------------------------------------------------------------------------------------------------------------------------------------------------------------------------------------------------------------------------------------------------------------------------------------------------------------------------------------------------------------------------------------------------------------------------------------------------------------------------------------------------------------------------------------------------------------------------------------------------------------------------------------------------------------------------------------------------------------------------------------------------------------------------------------------------------------------------------------------------------------------------------------------------------------------------------------------------------------------------------------------------------------------------------------------------------------------------------------------------------------------------------------------------------------------------------------------------------------------------------------------------------------------------------------------------------------------------------------------------------------------------------------------------------------------------------------------------------------------------------------------------------------|
|                         |     | up the results. Authors' names and articles' titles will be listed in alphabetical order. The auto-deduplication function of EndNote X8 will also be exploited. Where necessary, deduplication will be done manually.                                                                                                                                                                                                                                                                                                                                                                                                                                                                                                                                                                                                                                                                                                                                                                                                                                                                                                                                                                                                                                                                                                                                                                                                                                                                                                                                                                                                               |
| Selection process       | 11b | <p><b>State the process that will be used for selecting studies (such as two independent reviewers) through each phase of the review (that is, screening, eligibility and inclusion in meta-analysis)</b></p> <p>Studies are selected based on their relevance, determined by their title and/or abstract. Following the PICO framework specified above, the selection process will be carried out as follows:</p> <ul style="list-style-type: none"> <li>• Eligibility: Potentially eligible studies must be original, peer-reviewed articles (with available abstracts in English), which report multimorbidity prevalence. Only studies that clearly state that their participants are community-based adults and the designs are observational studies (e.g. cross-sectional and baseline of cohort studies) in the abstract are considered.</li> <li>• Screening: First, the title and abstract of all studies returned by the search will be screened. Only studies that satisfy all the eligibility criteria specified above will be kept for full text screening. Full text screening will be done by two independent reviewers (HN &amp; GM). First reviewer (HN) will be responsible for screening out 'definitely' eligible studies. Studies that are ambiguous will be assessed by the second reviewer (and if necessary, a third reviewer) for final inclusion. A second reviewer (CD) will also test a random sample of 10% of all references in the first screening to make sure eligible studies are not missed out.</li> <li>• Meta-analysis: final selected studies will be included for meta-analysis</li> </ul> |
| Data collection process | 11c | <p><b>Describe planned method of extracting data from reports (such as piloting forms, done independently, in duplicate), any processes for obtaining and confirming data from investigators</b></p> <p>A data extraction sheet will be developed, pilot-tested on 5 randomly selected eligible studies and refined accordingly. The first reviewer will extract data from the included studies and the second reviewer will check the extracted data. If there are any disagreements, the first and second reviewers will discuss to resolve them. If agreement cannot be reached, a third reviewer will be consulted. Where necessary, original authors of the included studies will be contacted for further information.</p>                                                                                                                                                                                                                                                                                                                                                                                                                                                                                                                                                                                                                                                                                                                                                                                                                                                                                                    |
| Data items              | 12  | <p><b>List and define all variables for which data will be sought (such as PICO items, funding sources), any pre-planned data assumptions and simplifications</b></p> <p>Data extracted from eligible studies include:</p> <ul style="list-style-type: none"> <li>• Year of study</li> <li>• Study design</li> <li>• Study sample size</li> <li>• Country of study</li> <li>• Length of follow-up (if applicable)</li> <li>• Definitions of multimorbidity</li> <li>• Number of diseases</li> <li>• Combination of diseases</li> <li>• Ascertainment of diseases</li> <li>• Measures of multimorbidity</li> </ul>                                                                                                                                                                                                                                                                                                                                                                                                                                                                                                                                                                                                                                                                                                                                                                                                                                                                                                                                                                                                                   |

|                                    |     |                                                                                                                                                                                                                                                                                                                                                                                                                                                                                                                                                                                                                                                                                                                                                                                                                                                                                                                                                                                                                                                                                                                                                                                                                                                                                                                                                                                                                                                                                                                                                                                                                                      |
|------------------------------------|-----|--------------------------------------------------------------------------------------------------------------------------------------------------------------------------------------------------------------------------------------------------------------------------------------------------------------------------------------------------------------------------------------------------------------------------------------------------------------------------------------------------------------------------------------------------------------------------------------------------------------------------------------------------------------------------------------------------------------------------------------------------------------------------------------------------------------------------------------------------------------------------------------------------------------------------------------------------------------------------------------------------------------------------------------------------------------------------------------------------------------------------------------------------------------------------------------------------------------------------------------------------------------------------------------------------------------------------------------------------------------------------------------------------------------------------------------------------------------------------------------------------------------------------------------------------------------------------------------------------------------------------------------|
|                                    |     | <ul style="list-style-type: none"> <li>Prevalence of multimorbidity</li> </ul>                                                                                                                                                                                                                                                                                                                                                                                                                                                                                                                                                                                                                                                                                                                                                                                                                                                                                                                                                                                                                                                                                                                                                                                                                                                                                                                                                                                                                                                                                                                                                       |
| Outcomes and prioritisation        | 13  | <p><b>List and define all outcomes for which data will be sought, including prioritisation of main and additional outcomes, with rationale</b></p> <p>Primary outcome: multimorbidity prevalence<br/>Secondary outcome: operationalisation of multimorbidity assessment</p>                                                                                                                                                                                                                                                                                                                                                                                                                                                                                                                                                                                                                                                                                                                                                                                                                                                                                                                                                                                                                                                                                                                                                                                                                                                                                                                                                          |
| Risk of bias in individual studies | 14  | <p><b>Describe anticipated methods for assessing risk of bias of individual studies, including whether this will be done at the outcome or study level, or both; state how this information will be used in data synthesis</b></p> <p>To reduce the risk of bias for individual studies, the Newcastle-Ottawa Scale (NOS) for assessing the quality of non-randomised studies will be used. NOS uses eight items, categorised into 3 domains of potential bias, namely selection (representativeness of the exposed cohort, selection of the non-exposed cohort, ascertainment of exposure, demonstration that outcome of interest was not present at start of study), comparability (on the basis of the design or analysis controlled for confounders) and outcome (assessment of outcome, was follow-up long enough for outcomes to occur and adequacy of follow-up of cohorts). A study can be given a maximum of one star for each item within the selection and outcome categories. A maximum of two stars can be given for Comparability. Thresholds for converting the Newcastle-Ottawa scales to AHRQ standards (good, fair and poor) are as follows:</p> <ul style="list-style-type: none"> <li>Good quality: 3 or 4 stars in selection domain AND 1 or 2 stars in comparability domain AND 2 or 3 stars in outcome/exposure domain</li> <li>Fair quality: 2 stars in selection domain AND 1 or 2 stars in comparability domain AND 2 or 3 stars in outcome/exposure domain</li> <li>Poor quality: 0 or 1 star in selection domain OR 0 star in comparability domain OR 0 or 1 star in outcome/exposure domain.</li> </ul> |
| Data synthesis                     | 15a | <p><b>Describe criteria under which study data will be quantitatively synthesised</b></p> <p>If sufficient studies are available and providing they are homogeneous, a meta-analysis will be carried out.</p>                                                                                                                                                                                                                                                                                                                                                                                                                                                                                                                                                                                                                                                                                                                                                                                                                                                                                                                                                                                                                                                                                                                                                                                                                                                                                                                                                                                                                        |
|                                    | 15b | <p><b>If data are appropriate for quantitative synthesis, describe planned summary measures, methods of handling data and methods of combining data from studies, including any planned exploration of consistency</b></p> <p>Overall and stratified analyses according to multimorbidity operational definitions will be performed. I-squared statistic will be employed to evaluate heterogeneity across studies (Higgins &amp; Thompson, 2002). A random effect model for meta-analysis will be used.</p>                                                                                                                                                                                                                                                                                                                                                                                                                                                                                                                                                                                                                                                                                                                                                                                                                                                                                                                                                                                                                                                                                                                         |
|                                    | 15c | <p><b>Describe any proposed additional analyses (such as sensitivity or subgroup analyses, meta-regression)</b></p> <p>Subgroup analysis based on multimorbidity definitions and HICs/LMICs status will be performed. Sensitivity analysis which tests the influence of a single study on the meta-analysis estimation of the pooled prevalence will also be carried out.</p>                                                                                                                                                                                                                                                                                                                                                                                                                                                                                                                                                                                                                                                                                                                                                                                                                                                                                                                                                                                                                                                                                                                                                                                                                                                        |
|                                    | 15d | <p><b>If quantitative synthesis is not appropriate, describe the type of summary planned</b></p> <p>If due to the heterogeneity of the selected studies (e.g. in defining multimorbidity) a meta-analysis is not possible, a narrative/descriptive synthesis will be carried out to summarise and compare the prevalence of multimorbidity in community settings between HICs and LMICs.</p>                                                                                                                                                                                                                                                                                                                                                                                                                                                                                                                                                                                                                                                                                                                                                                                                                                                                                                                                                                                                                                                                                                                                                                                                                                         |
| Meta-bias(es)                      | 16  | <p><b>Specify any planned assessment of meta-bias(es) (such as publication bias across studies, selective reporting within studies)</b></p>                                                                                                                                                                                                                                                                                                                                                                                                                                                                                                                                                                                                                                                                                                                                                                                                                                                                                                                                                                                                                                                                                                                                                                                                                                                                                                                                                                                                                                                                                          |

|                                   |    |                                                                                                                                                                                                                                                                                                                                                                                                                                            |
|-----------------------------------|----|--------------------------------------------------------------------------------------------------------------------------------------------------------------------------------------------------------------------------------------------------------------------------------------------------------------------------------------------------------------------------------------------------------------------------------------------|
|                                   |    | We will assess whether the protocol of cross-sectional, longitudinal or case-control study designs are followed properly to determine whether reporting bias is present. From here we can evaluate whether the authors report results selectively (i.e. only statistically significant results are reported/published). A funnel plot can also be employed to check for the existence of publication bias if there are sufficient studies. |
| Confidence in cumulative evidence | 17 | <b>Describe how the strength of the body of evidence will be assessed (such as GRADE)</b><br>The quality of our findings will be assessed by performing a sensitivity analysis, if the selected studies allow it. For instance, only high quality studies (based on the Newcastle-Ottawa Scale) will be included to see if our findings change.                                                                                            |

**Supplement 2: search strategy**

| Interface | Datasets                                                         | Search Strategy                                                                                                                                                                                                                                                                                                                                                                                                                                                                                                                                                                                                                                                                                                                                                                                                                                                                                                                                                                                                                                                  | Limits applied | Number of articles retrieved                                                                                                                                                                                                                        | Final no. exported to Endnote |
|-----------|------------------------------------------------------------------|------------------------------------------------------------------------------------------------------------------------------------------------------------------------------------------------------------------------------------------------------------------------------------------------------------------------------------------------------------------------------------------------------------------------------------------------------------------------------------------------------------------------------------------------------------------------------------------------------------------------------------------------------------------------------------------------------------------------------------------------------------------------------------------------------------------------------------------------------------------------------------------------------------------------------------------------------------------------------------------------------------------------------------------------------------------|----------------|-----------------------------------------------------------------------------------------------------------------------------------------------------------------------------------------------------------------------------------------------------|-------------------------------|
| OVID      | MedLine<br>Embase<br>Embase Classic<br>Global Health<br>PsycINFO | <ol style="list-style-type: none"> <li>1. multimorbidit*.mp. [mp=ti, ab, hw, tn, ot, dm, mf, dv, kw, fx, nm, kf, px, rx, an, ui, sy, bt, id, cc, tc, tm]</li> <li>2. multi-morbidit*.mp. [mp=ti, ab, hw, tn, ot, dm, mf, dv, kw, fx, nm, kf, px, rx, an, ui, sy, bt, id, cc, tc, tm]</li> <li>3. (multi adj morbidit*).mp. [mp=ti, ab, hw, tn, ot, dm, mf, dv, kw, fx, nm, kf, px, rx, an, ui, sy, bt, id, cc, tc, tm]</li> <li>4. multiple morbidit*.mp. [mp=ti, ab, hw, tn, ot, dm, mf, dv, kw, fx, nm, kf, px, rx, an, ui, sy, bt, id, cc, tc, tm]</li> <li>5. multiple-morbidit*.mp. [mp=ti, ab, hw, tn, ot, dm, mf, dv, kw, fx, nm, kf, px, rx, an, ui, sy, bt, id, cc, tc, tm]</li> <li>6. 1 or 2 or 3 or 4 or 5</li> <li>7. prevalence.mp. [mp=ti, ab, hw, tn, ot, dm, mf, dv, kw, fx, nm, kf, px, rx, an, ui, sy, bt, id, cc, tc, tm]</li> <li>8. epidemiology.mp. [mp=ti, ab, hw, tn, ot, dm, mf, dv, kw, fx, nm, kf, px, rx, an, ui, sy, bt, id, cc, tc, tm]</li> <li>9. 7 or 8</li> <li>10. 6 and 9</li> <li>11. remove duplicates from 10</li> </ol> | de-duplication | <ol style="list-style-type: none"> <li>1. 6939</li> <li>2. 1261</li> <li>3. 1261</li> <li>4. 860</li> <li>5. 860</li> <li>6. 8810</li> <li>7. 1853143</li> <li>8. 1847977</li> <li>9. 3238987</li> <li>10. 3209</li> <li><b>11. 2142</b></li> </ol> | <b>2142</b>                   |



|                       |                                         |                                                                                                                                                                                                                                                              |     |                                                                                                                   |             |
|-----------------------|-----------------------------------------|--------------------------------------------------------------------------------------------------------------------------------------------------------------------------------------------------------------------------------------------------------------|-----|-------------------------------------------------------------------------------------------------------------------|-------------|
| Web of Science        | Web of Science Core Collection          | #1. TI=multimorbidit*<br>#2. TI=multi-morbidit*<br>#3. TI=(multi NEAR/0 morbidit*)<br>#4. TI=multiple morbidit*<br>#5. TI=multiple-morbidit*<br>#6. #1 OR #2 OR #3 OR #4 OR #5<br>#7. TI=prevalence<br>#8. TI=epidemiology<br>#9. #7 OR #8<br>#10. #6 AND #9 | N/A | 1. 1146<br>2. 118<br>3. 118<br>4. 253<br>5. 54<br>6. 1517<br>7. 142417<br>8. 56656<br>9. 198277<br><b>10. 107</b> | <b>107</b>  |
| Willey Online Library | Cochrane Database of Systematic Reviews | #1. multimorbidit*<br>#2. multi-morbidit*<br>#3. multi NEXT morbidit*<br>#4. multiple morbidit*<br>#5. multiple-morbidit*<br>#6. #1 OR #2 OR #3 OR #4 OR #5<br>#7. prevalence<br>#8. epidemiology<br>#9. #7 OR #8<br>#10. #6 AND #9                          | N/A | 1. 119<br>2. 35<br>3. 35<br>4. 4988<br>5. 24<br>6. 5111<br>7. 29947<br>8. 62781<br>9. 83654<br><b>10. 2111</b>    | <b>2111</b> |

**Supplement 3: the Newcastle-Ottawa Scale (NOS) for data quality assessment**

| No. | Study                        | representativeness | sample size | non-respondents | ascertainment of the exposure | comparability | assessment of the outcome | statistical test | selection score | comparability score | outcome score | Total score | Good/Fair/Poor? |
|-----|------------------------------|--------------------|-------------|-----------------|-------------------------------|---------------|---------------------------|------------------|-----------------|---------------------|---------------|-------------|-----------------|
| 1   | Afshar 2015                  | 1                  | 1           | 1               | 1                             | 1             | 1                         | 1                | 4               | 1                   | 2             | 7           | good            |
| 2   | Agborsangaya 2013            | 1                  | 1           | 1               | 1                             | 1             | 1                         | 1                | 4               | 1                   | 2             | 7           | good            |
| 3   | Alaba & Chola 2013           | 1                  | 1           | 1               | 1                             | 1             | 1                         | 1                | 4               | 1                   | 2             | 7           | good            |
| 4   | Alimohammadian 2018          | 1                  | 1           | 1               | 1                             | 1             | 1                         | 1                | 4               | 1                   | 2             | 7           | good            |
| 5   | Amaral 2018                  | 0                  | 0           | 0               | 1                             | 1             | 1                         | 1                | 1               | 1                   | 2             | 4           | poor            |
| 6   | Araujo 2018                  | 1                  | 1           | 1               | 1                             | 1             | 1                         | 1                | 4               | 1                   | 2             | 7           | good            |
| 7   | Banjare & Pradhan 2014       | 1                  | 0           | 1               | 1                             | 0             | 0                         | 1                | 3               | 0                   | 1             | 4           | poor            |
| 8   | Buttery 2016                 | 1                  | 1           | 1               | 1                             | 1             | 1                         | 1                | 4               | 1                   | 2             | 7           | good            |
| 9   | Camargo-Casas 2018           | 1                  | 1           | 1               | 1                             | 1             | 1                         | 1                | 4               | 1                   | 2             | 7           | good            |
| 10  | Chen 2018                    | 1                  | 1           | 1               | 1                             | 1             | 1                         | 1                | 4               | 1                   | 2             | 7           | good            |
| 11  | Cheung 2018                  | 1                  | 1           | 1               | 1                             | 1             | 1                         | 1                | 4               | 1                   | 2             | 7           | good            |
| 12  | de Carvalho 2017             | 1                  | 1           | 1               | 1                             | 1             | 1                         | 1                | 4               | 1                   | 2             | 7           | good            |
| 13  | de Souza Santos Machado 2012 | 0                  | 1           | 1               | 1                             | 1             | 1                         | 1                | 3               | 1                   | 2             | 6           | good            |
| 14  | de Souza Santos Machado 2013 | 1                  | 1           | 1               | 1                             | 1             | 1                         | 1                | 4               | 1                   | 2             | 7           | good            |
| 15  | Dhawalni 2016                | 1                  | 1           | 1               | 1                             | 1             | 1                         | 1                | 4               | 1                   | 2             | 7           | good            |
| 16  | El Lawindi 2019              | 1                  | 1           | 1               | 1                             | 1             | 1                         | 1                | 4               | 1                   | 2             | 7           | good            |
| 17  | Fuchs 2012                   | 1                  | 1           | 1               | 1                             | 1             | 1                         | 1                | 4               | 1                   | 2             | 7           | good            |
| 18  | Garin 2016                   | 1                  | 1           | 1               | 1                             | 1             | 1                         | 1                | 4               | 1                   | 2             | 7           | good            |
| 19  | Ge 2018                      | 1                  | 1           | 1               | 1                             | 1             | 1                         | 1                | 4               | 1                   | 2             | 7           | good            |
| 20  | Gu 2017                      | 1                  | 1           | 1               | 1                             | 1             | 1                         | 1                | 4               | 1                   | 2             | 7           | good            |
| 21  | Hameed 2015                  | 0                  | 0           | 0               | 1                             | 0             | 1                         | 0                | 1               | 0                   | 1             | 2           | poor            |
| 22  | Hien 2014                    | 1                  | 1           | 1               | 1                             | 1             | 1                         | 1                | 4               | 1                   | 2             | 7           | good            |
| 23  | Humphreys 2018               | 1                  | 1           | 1               | 1                             | 1             | 1                         | 1                | 4               | 1                   | 2             | 7           | good            |
| 24  | Islam 2014                   | 1                  | 1           | 1               | 1                             | 1             | 1                         | 1                | 4               | 1                   | 2             | 7           | good            |

|    |                        |   |   |   |   |   |   |   |   |   |   |   |      |
|----|------------------------|---|---|---|---|---|---|---|---|---|---|---|------|
| 25 | Jankovic 2018          | 1 | 1 | 1 | 1 | 1 | 1 | 1 | 4 | 1 | 2 | 7 | good |
| 26 | Jerliu 2013            | 1 | 1 | 1 | 1 | 1 | 1 | 1 | 4 | 1 | 2 | 7 | good |
| 27 | Johnston 2019          | 1 | 1 | 1 | 1 | 1 | 1 | 1 | 4 | 1 | 2 | 7 | good |
| 28 | Khanam 2011            | 1 | 1 | 0 | 1 | 1 | 1 | 1 | 3 | 1 | 2 | 6 | good |
| 29 | Kiliari 2014           | 1 | 1 | 1 | 1 | 1 | 1 | 1 | 4 | 1 | 2 | 7 | good |
| 30 | Kirchberger 2012       | 1 | 1 | 1 | 1 | 1 | 1 | 1 | 4 | 1 | 2 | 7 | good |
| 31 | Kshipra 2018           | 1 | 0 | 1 | 1 | 1 | 1 | 1 | 3 | 1 | 2 | 6 | good |
| 32 | Kumar 2015             | 0 | 1 | 1 | 1 | 1 | 1 | 1 | 3 | 1 | 2 | 6 | good |
| 33 | Lai 2019               | 1 | 1 | 1 | 1 | 1 | 1 | 1 | 4 | 1 | 2 | 7 | good |
| 34 | Laires 2019            | 1 | 1 | 1 | 1 | 1 | 1 | 1 | 4 | 1 | 2 | 7 | good |
| 35 | Lalitha 2016           | 1 | 1 | 1 | 1 | 1 | 1 | 1 | 4 | 1 | 2 | 7 | good |
| 36 | Lang 2015              | 1 | 1 | 1 | 1 | 1 | 1 | 1 | 4 | 1 | 2 | 7 | good |
| 37 | Larsen 2017            | 1 | 1 | 1 | 1 | 1 | 1 | 1 | 4 | 1 | 2 | 7 | good |
| 38 | Le Cossec 2016         | 1 | 1 | 1 | 1 | 1 | 1 | 1 | 4 | 1 | 2 | 7 | good |
| 39 | Li 2019                | 1 | 1 | 1 | 1 | 1 | 1 | 1 | 4 | 1 | 2 | 7 | good |
| 40 | Loprinzi, P.D 2015     | 0 | 0 | 0 | 1 | 0 | 1 | 0 | 1 | 0 | 1 | 2 | poor |
| 41 | Loza 2009              | 1 | 1 | 1 | 1 | 1 | 1 | 1 | 4 | 1 | 2 | 7 | good |
| 42 | Lujic 2017             | 1 | 1 | 1 | 1 | 1 | 1 | 1 | 4 | 1 | 2 | 7 | good |
| 43 | Maregoni 2016          | 1 | 1 | 1 | 1 | 1 | 1 | 1 | 4 | 1 | 2 | 7 | good |
| 44 | Mini & Thankappan 2017 | 1 | 1 | 1 | 1 | 1 | 1 | 1 | 4 | 1 | 2 | 7 | good |
| 45 | Ninh 2015              | 1 | 1 | 1 | 1 | 1 | 1 | 1 | 4 | 1 | 2 | 7 | good |
| 46 | Noguchi 2016           | 1 | 1 | 1 | 1 | 1 | 1 | 1 | 4 | 1 | 2 | 7 | good |
| 47 | Nunes 2019             | 1 | 1 | 1 | 1 | 1 | 1 | 1 | 4 | 1 | 2 | 7 | good |
| 48 | Nunes 2016             | 1 | 1 | 1 | 1 | 1 | 1 | 1 | 4 | 1 | 2 | 7 | good |
| 49 | Nunes 2015             | 1 | 1 | 1 | 1 | 1 | 1 | 1 | 4 | 1 | 2 | 7 | good |
| 50 | Pache 2015             | 1 | 0 | 0 | 1 | 1 | 1 | 1 | 2 | 1 | 2 | 5 | fair |
| 51 | Park 2018              | 1 | 1 | 1 | 1 | 1 | 1 | 1 | 4 | 1 | 2 | 7 | good |
| 52 | Picco 2016             | 1 | 1 | 1 | 1 | 1 | 1 | 1 | 4 | 1 | 2 | 7 | good |
| 53 | Ramond-Roquin 2016     | 1 | 0 | 0 | 1 | 1 | 1 | 1 | 2 | 1 | 2 | 5 | fair |

|    |                 |   |   |   |   |   |   |   |   |   |   |   |      |
|----|-----------------|---|---|---|---|---|---|---|---|---|---|---|------|
| 54 | Roberts 2015    | 1 | 1 | 1 | 1 | 1 | 1 | 1 | 4 | 1 | 2 | 7 | good |
| 55 | Rodrigues 2019  | 1 | 1 | 1 | 1 | 1 | 1 | 1 | 4 | 1 | 2 | 7 | good |
| 56 | Romana 2019     | 1 | 1 | 1 | 1 | 1 | 1 | 1 | 4 | 1 | 2 | 7 | good |
| 57 | Ruel 2014       | 1 | 1 | 1 | 1 | 1 | 1 | 1 | 4 | 1 | 2 | 7 | good |
| 58 | Ruel 2014       | 1 | 1 | 1 | 1 | 1 | 1 | 1 | 4 | 1 | 2 | 7 | good |
| 59 | Ryan 2018       | 1 | 1 | 1 | 1 | 1 | 1 | 1 | 4 | 1 | 2 | 7 | good |
| 60 | Sakib 2019      | 1 | 1 | 1 | 1 | 1 | 1 | 1 | 4 | 1 | 2 | 7 | good |
| 61 | Singh 2019      | 1 | 1 | 1 | 1 | 1 | 1 | 1 | 4 | 1 | 2 | 7 | good |
| 62 | Su 2016         | 1 | 1 | 0 | 1 | 1 | 1 | 1 | 3 | 1 | 2 | 6 | good |
| 63 | Timmermans 2019 | 1 | 1 | 1 | 1 | 1 | 1 | 1 | 4 | 1 | 2 | 7 | good |
| 64 | Valadares 2015  | 1 | 1 | 1 | 1 | 1 | 1 | 1 | 4 | 1 | 2 | 7 | good |
| 65 | Violan 2013     | 1 | 1 | 1 | 1 | 1 | 1 | 1 | 4 | 1 | 2 | 7 | good |
| 66 | Wang 2014       | 1 | 1 | 0 | 1 | 1 | 1 | 1 | 3 | 1 | 2 | 6 | good |
| 67 | Wang 2017       | 1 | 1 | 1 | 1 | 1 | 1 | 1 | 4 | 1 | 2 | 7 | good |
| 68 | Wang 2015       | 1 | 1 | 1 | 1 | 1 | 1 | 1 | 4 | 1 | 2 | 7 | good |
| 69 | Wang 2015       | 1 | 1 | 1 | 1 | 1 | 1 | 1 | 4 | 1 | 2 | 7 | good |
| 70 | Wong 2008       | 0 | 0 | 0 | 1 | 1 | 1 | 1 | 1 | 1 | 2 | 4 | poor |

- Good quality: 3 or 4 stars in selection domain AND 1 or 2 stars in comparability domain AND 2 or 3 stars in outcome/exposure domain
- Fair quality: 2 stars in selection domain AND 1 or 2 stars in comparability domain AND 2 or 3 stars in outcome/exposure domain
- Poor quality: 0 or 1 star in selection domain OR 0 star in comparability domain OR 0 or 1 star in outcome/exposure domain.

#### Supplement 4: Multimorbidity prevalence by gender

| Study                              | Male       | Female | Difference | Sample size |
|------------------------------------|------------|--------|------------|-------------|
| Agborsangaya 2013                  | 38.2       | 39.6   | 1.4        | 4803        |
| Alaba & Chola 2013                 | 26.0       | 74.0   | 48.0       | 11638       |
| Alimohammadian 2018                | 13.4       | 25.0   | 11.6       | 49946       |
| Banjare & Pradhan 2014             | 63.4       | 50.3   | -13.1      | 310         |
| de Carvalho 2017                   | 18.2       | 28.4   | 10.2       | 60202       |
| Johnston 2019                      | 4.8        | 6.0    | 1.2        | 7184        |
| Kshipra 2018                       | 32.8       | 28.1   | -4.7       | 400         |
| Fuchs 2012                         | 36.3       | 43.9   | 7.6        | 21262       |
| Hien 2014                          | 59.1       | 71.8   | 12.7       | 389         |
| Jankovic 2018                      | 24.6       | 34.9   | 10.3       | 13765       |
| Khanam 2011                        | 39.7       | 65.3   | 25.6       | 452         |
| Kumar 2015                         | 0.7        | 0.6    | -0.1       | 55091       |
| Le Cossec 2016                     | 18.7       | 15.2   | -3.5       | 11089       |
| Li 2019                            | 15.2       | 16.8   | 1.6        | 4833        |
| Nunes 2019                         | 58.9       | 75.5   | 16.6       | 9412        |
| Nunes 2016                         | 20.4       | 35.2   | 14.8       | 2927        |
| Nunes 2015                         | 67.3       | 82.1   | 14.8       | 1593        |
| Pache 2015                         | 28.7       | 40.2   | 11.5       | 3714        |
| Picco 2016                         | 49.6       | 52.9   | 3.3        | 2565        |
| Ryan 2018                          | 42.7       | 57.3   | 14.6       | 4823        |
| Roberts 2015                       | 10.6       | 15.1   | 4.5        | 105416      |
| Wang 2014                          | 9.2        | 13.0   | 3.8        | 162464      |
| Wang 2017                          | 23.8       | 27.9   | 4.1        | 8841        |
| Wang 2015                          | 90.4       | 90.6   | 0.2        | 1480        |
| <b>Average difference</b>          | <b>8.2</b> |        |            |             |
| <b>Weighted average difference</b> | <b>6.5</b> |        |            |             |

## Supplement 5: Meta-analysis of multimorbidity prevalence

| Study                                 | Prevalence (95% CI) |
|---------------------------------------|---------------------|
| <b>LMICs</b>                          |                     |
| Afshar (2015) Myanmar                 | 1.7 (1.4 - 2.1)     |
| Afshar (2015) Bangladesh              | 6.8 (6.2 - 7.5)     |
| Afshar (2015) Bosnia and Herzegovina  | 7.6 (6.1 - 9.3)     |
| Afshar (2015) Brazil                  | 13.4 (12.5 - 14.4)  |
| Afshar (2015) Burkina Faso            | 6.31 (5.7 - 7.0)    |
| Afshar (2015) Dominican Republic      | 7.2 (6.5 - 8.0)     |
| Afshar (2015) Georgia                 | 9.6 (8.6 - 10.7)    |
| Afshar (2015) Ghana                   | 3.6 (3.1 - 4.2)     |
| Afshar (2015) Kazakhstan              | 8.49 (7.7 - 9.3)    |
| Afshar (2015) Kenya                   | 4.2 (3.7 - 4.8)     |
| Afshar (2015) Laos                    | 3.6 (3.1 - 4.2)     |
| Afshar (2015) Malaysia                | 5.6 (5.1 - 6.2)     |
| Afshar (2015) Mauritius               | 7.8 (7.0 - 8.7)     |
| Afshar (2015) Morocco                 | 6.4 (5.8 - 7.1)     |
| Afshar (2015) Namibia                 | 7.9 (7.1 - 8.7)     |
| Afshar (2015) Nepal                   | 15.2 (14.5 - 16.0)  |
| Afshar (2015) Pakistan                | 4.9 (4.4 - 5.5)     |
| Afshar (2015) Paraguay                | 5.7 (5.1 - 6.4)     |
| Afshar (2015) Philippines             | 7.1 (6.6 - 7.6)     |
| Afshar (2015) South Africa            | 11.2 (10.0 - 12.4)  |
| Afshar (2015) Sri Lanka               | 3.9 (3.5 - 4.4)     |
| Afshar (2015) Ukraine                 | 10.0 (9.0 - 11.2)   |
| Afshar (2015) Uruguay                 | 7.3 (6.4 - 8.3)     |
| Agrawal (2016) China                  | 21.8 (21.2 - 22.5)  |
| Agrawal (2016) Ghana                  | 23.3 (22.1 - 24.5)  |
| Agrawal (2016) India                  | 23.7 (22.9 - 24.5)  |
| Agrawal (2016) Mexico                 | 29.6 (27.8 - 31.4)  |
| Agrawal (2016) Russia                 | 54.7 (53.1 - 56.3)  |
| Agrawal (2016) South Africa           | 22.0 (20.7 - 23.3)  |
| Alaba & Chola (2013) South Africa     | 4.0 (3.6 - 4.4)     |
| Alimohammadian (2018) Iran            | 19.4 (19.1 - 19.8)  |
| Amaral (2018) Brazil                  | 66.3 (60.4 - 71.7)  |
| Araujo (2018) Brazil                  | 29.0 (27.6 - 30.4)  |
| Banjare & Pradhan (2014) India        | 56.8 (51.2 - 62.2)  |
| Camargo-Casas (2018) (Colombia)       | 40.4 (38.3 - 42.6)  |
| Chen (2018) China                     | 46.1 (44.5 - 47.7)  |
| de_Carvalho (2017) Brazil             | 23.6 (23.3 - 23.9)  |
| de_Souza_Santos_Machado (2012) Brazil | 39.3 (34.5 - 44.3)  |
| de_Souza_Santos_Machado (2013) Brazil | 58.2 (54.3 - 62.0)  |
| El Lawindi (2019) Egypt               | 19.6 (18.0 - 21.3)  |
| Garin (2016) China                    | 46.5 (45.6 - 47.3)  |
| Garin (2016) Mexico                   | 68.7 (66.8 - 70.6)  |
| Garin (2016) South Africa             | 61.9 (60.4 - 63.5)  |

|                                             |                           |
|---------------------------------------------|---------------------------|
| Garin (2016) Ghana                          | 47.6 (46.1 - 49.1)        |
| Garin (2016) India                          | 57.9 (56.7 - 59.1)        |
| Garin (2016) Russia                         | 73.9 (72.4 - 75.2)        |
| Gu (2017) China                             | 49.4 (47.4 - 51.4)        |
| Hameed (2015) India                         | 79.5 (75.1 - 83.3)        |
| Hien (2014) Burkina Faso                    | 64.8 (59.9 - 69.4)        |
| Jankovic (2018) Serbia                      | 30.2 (29.4 - 30.9)        |
| Jerliu (2013) Kosovo                        | 51.1 (48.8 - 53.3)        |
| Khanam (2011) Bangladesh                    | 53.8 (49.2 - 58.3)        |
| Kshipra (2018) India                        | 31.0 (26.7 - 35.7)        |
| Kumar (2015) India                          | 0.7 (0.6 - 0.7)           |
| Lalitha (2016) India                        | 44.1 (40.7 - 47.5)        |
| Mini & Thankappan (2017) India              | 30.7 (29.8 - 31.6)        |
| Ninh (2015) Vietnam                         | 39.2 (37.3 - 41.2)        |
| Nunes (2016) Brazil                         | 29.1 (27.5 - 30.8)        |
| Nunes (2019) Brazil                         | 67.8 (66.9 - 68.7)        |
| Nunes (2015) Brazil                         | 81.3 (79.3 - 83.1)        |
| Ruel (2014) China                           | 14.0 (12.0 - 16.3)        |
| Singh (2019) India & Pakistan               | 14.7 (14.2 - 15.3)        |
| Su (2016) China                             | 49.2 (47.0 - 51.3)        |
| Valadares (2015) Brazil                     | 53.0 (49.4 - 56.6)        |
| Wang (2014) China                           | 11.1 (11.0 - 11.2)        |
| Wang (2015) China                           | 90.5 (88.9 - 91.9)        |
| Wang (2015) China                           | 24.7 (24.1 - 25.3)        |
| <b>Pooled prevalence estimate for LMICs</b> | <b>29.7 (26.4 - 33.0)</b> |
| <b>HICs</b>                                 |                           |
| Afshar (2015) Czech Republic                | 9.4 (7.7 - 11.4)          |
| Afshar (2015) Estonia                       | 11.5 (9.7 - 13.6)         |
| Afshar (2015) Hungary                       | 15.0 (13.3 - 17.0)        |
| Afshar (2015) Latvia                        | 9.6 (7.9 - 11.6)          |
| Afshar (2015) Spain                         | 7.8 (7.2 - 8.5)           |
| Agborsangaya (2013) Canada                  | 36.1 (34.8 - 37.5)        |
| Buttery (2016) Germany - Male               | 36.1 (33.6 - 38.7)        |
| Buttery (2016) Germany - Female             | 40.5 (38.1 - 43.0)        |
| Cheung (2018) Hong Kong                     | 41.8 (39.9 - 43.7)        |
| Dhawalni (2016) England                     | 31.7 (30.8 - 32.6)        |
| Fuchs (2012) Germany - Male                 | 36.3 (35.4 - 37.2)        |
| Fuchs (2012) Germany - Female               | 43.9 (43.0 - 44.8)        |
| Garin (2016) Finland                        | 69.2 (66.8 - 71.5)        |
| Garin (2016) Spain                          | 68.4 (66.8 - 69.9)        |
| Garin (2016) Poland                         | 70.1 (68.5 - 71.8)        |
| Garin (2014) Spain                          | 20.0 (18.9 - 21.2)        |
| Ge (2018) Singapore                         | 36.9 (34.7 - 39.0)        |
| Humphreys (2018) UK                         | 43.4 (41.4 - 45.5)        |
| Islam (2014) Australia                      | 52.0 (50.5 - 53.4)        |
| Johnston (2019) UK                          | 5.4 (4.9 - 6.0)           |
| Kiliari (2014) Cyprus                       | 28.6 (24.7 - 32.9)        |
| Kirchberger (2012) Germany                  | 59.7 (58.2 - 61.2)        |

|                                            |                           |
|--------------------------------------------|---------------------------|
| Lai (2019)                                 | 3.5 (3.2 – 3.8)           |
| Laires (2019)                              | 43.9 (43.1 – 44.7)        |
| Lang (2015) US                             | 30.6 (29.0 - 32.3)        |
| Larsen (2017) Denmark                      | 39.7 (39.4 - 39.9)        |
| Le Cossec (2016) France - Male             | 18.7 (17.6 - 19.9)        |
| Le Cossec (2016) France - Female           | 15.2 (14.3 - 16.1)        |
| Loprinzi P.D (2015) US                     | 58.4 (56.3 - 60.5)        |
| Loza (2009) Spain                          | 30.0 (28.1 - 32.0)        |
| Lujic (2017) Australia                     | 37.4 (37.1 - 37.7)        |
| Maregoni (2016) Sweden                     | 52.4 (50.7 - 54.1)        |
| Noguchi (2016) Australia                   | 68.6 (66.4 - 70.8)        |
| Pache (2015) Switzerland                   | 34.8 (33.3 - 36.4)        |
| Park (2018) Korea                          | 26.8 (25.7 – 27.9)        |
| Picco (2016) Singapore                     | 55.4 (53.4 - 57.3)        |
| Ramond.Roquin (2016) Canada                | 63.8 (61.5 - 66.1)        |
| Roberts (2015) Canada                      | 12.9 (12.7 - 13.1)        |
| Rodrigues (2018) Portugal                  | 67.9 (66.0 – 69.7)        |
| Romana (2019)                              | 38.4 (37.0 – 39.8)        |
| Ruel (2014) Australia                      | 31.6 (29.5 - 33.7)        |
| Ryan (2018) Ireland                        | 53.7 (52.3 – 55.1)        |
| Timmermans (2019) the Netherlands          | 43.6 (41.6 – 45.7)        |
| Violan (2013) Spain                        | 59.6 (58.8 - 60.4)        |
| Wang (2017) Australia                      | 28.7 (27.8 - 29.7)        |
| <b>Pooled prevalence estimate for HICs</b> | <b>37.9 (32.5 - 43.4)</b> |
| <b>Overall pooled prevalence estimate</b>  | <b>33.1 (30.0 – 36.3)</b> |



**Supplement 6: Forest plot showing the pooled prevalence of multimorbidity (non-standardised)**

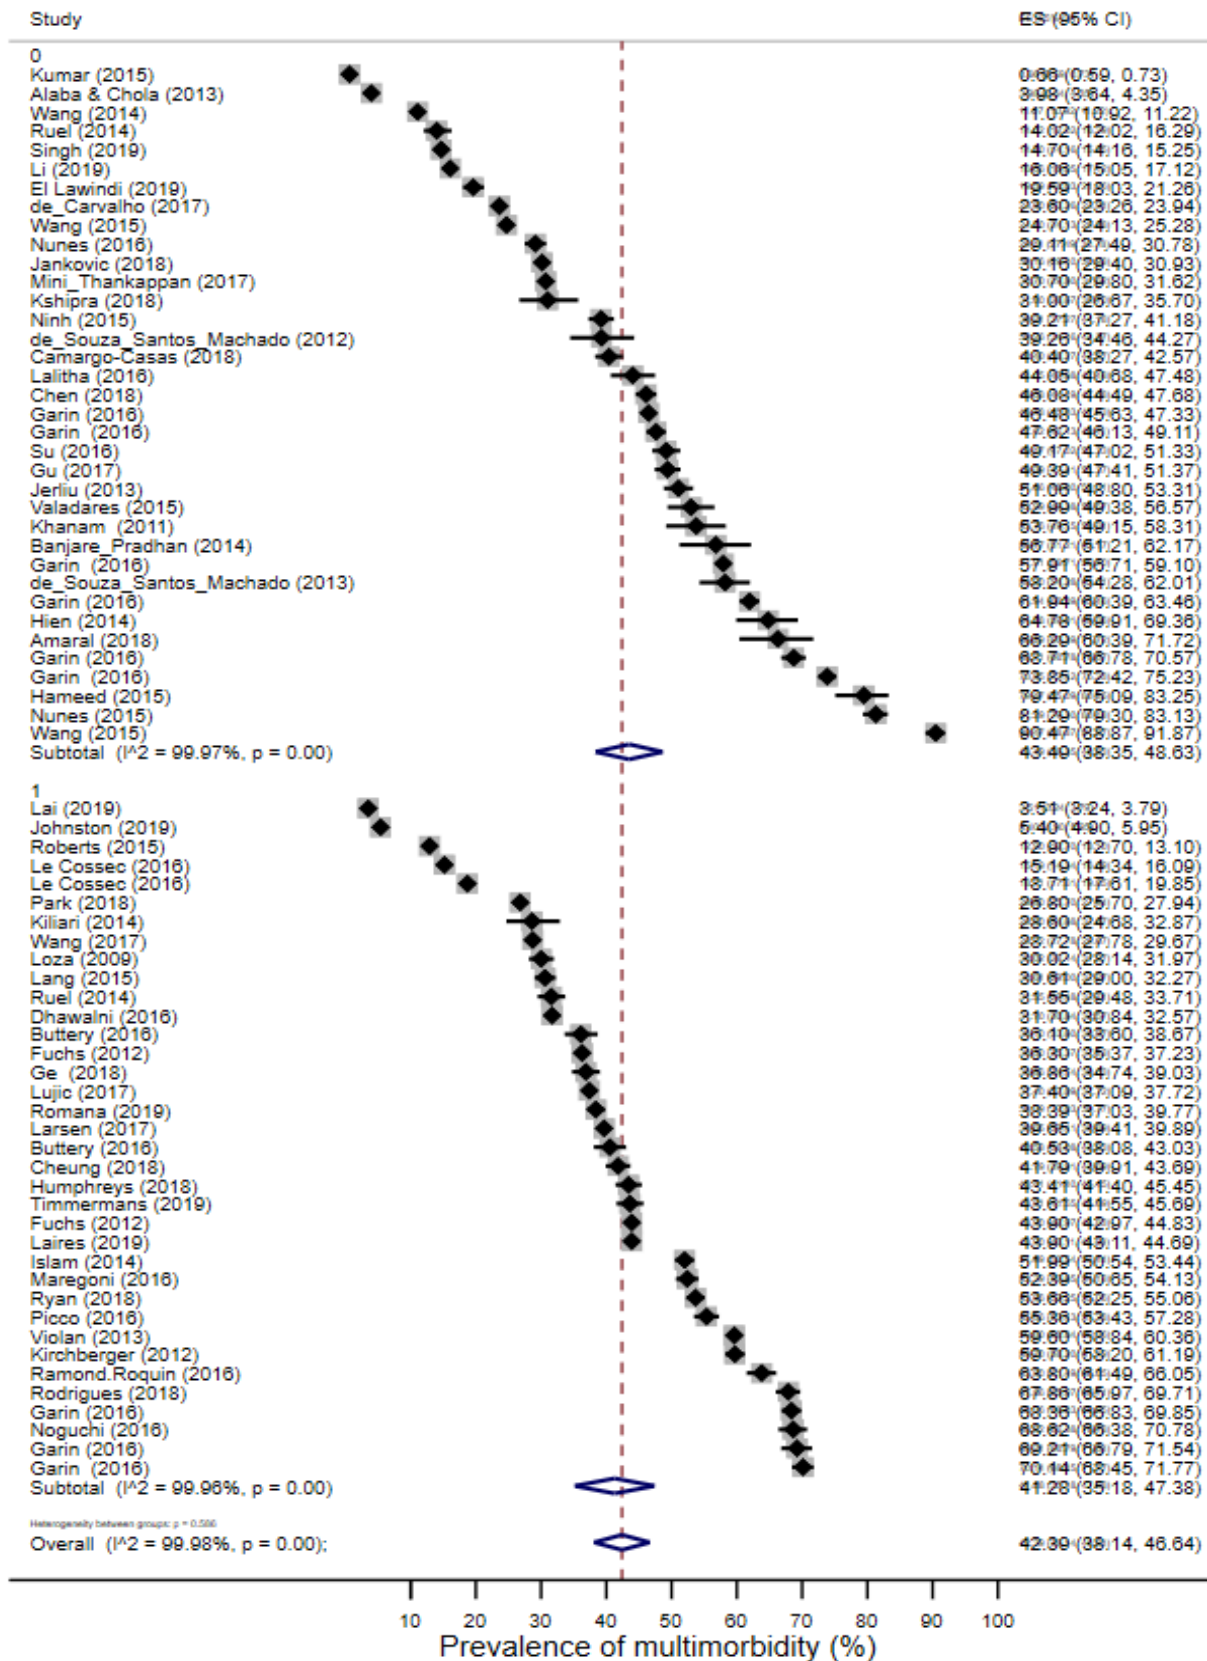

Supplement: Supplement_materials_revised.pdf [file Supplement_materials_revised.pdf]
